# Supplementary material for: Local Variability of Trace Element Concentration in Barn Swallow (Hirundo rustica) Nestlings from the Po Plain (Northern Italy)
Source: MDPI journal article supplement (doi:10.3390/environments10080145), 2023-08-14
Supplement: s1 [file s1]

**Supplementary Table 1.** Mean, standard error (SE), minimum (Min) and maximum (Max) concentrations of the 12 trace elements measured in feathers collected in the six groups of colonies. Concentrations are expressed in  $\mu\text{g/g}$ . Contaminants are presented in decreasing mean concentration order.

| Element | Group        | Mean  | SE   | Min   | Max   |
|---------|--------------|-------|------|-------|-------|
| Zn      | Sludge19     | 232.5 | 6.3  | 154.0 | 366.4 |
|         | Sludge20     | 239.6 | 8.9  | 101.2 | 413.2 |
|         | No-sludge19C | 200.6 | 5.3  | 161.2 | 230.3 |
|         | No-sludge20C | 211.0 | 5.1  | 180.3 | 242.5 |
|         | No-sludge19F | 188.6 | 4.1  | 158.8 | 231.4 |
|         | No-sludge20F | 207.6 | 9.1  | 124.5 | 287.7 |
| Al      | Sludge19     | 73.9  | 7.7  | 25.3  | 354.7 |
|         | Sludge20     | 105.8 | 9.8  | 26.3  | 429.8 |
|         | No-sludge19C | 78.1  | 12.5 | 18.0  | 189.1 |
|         | No-sludge20C | 154.7 | 13.2 | 76.1  | 225.3 |
|         | No-sludge19F | 72.6  | 6.7  | 34.4  | 182.7 |
|         | No-sludge20F | 123.5 | 20.0 | 61.8  | 404.7 |
| Fe      | Sludge19     | 71.8  | 4.1  | 28.8  | 152.2 |
|         | Sludge20     | 91.2  | 5.7  | 37.7  | 226.2 |
|         | No-sludge19C | 84.7  | 7.6  | 50.2  | 173.0 |
|         | No-sludge20C | 75.0  | 6.2  | 48.7  | 122.6 |
|         | No-sludge19F | 70.5  | 3.9  | 42.2  | 141.4 |
|         | No-sludge20F | 61.7  | 5.3  | 31.0  | 123.2 |
| Cu      | Sludge19     | 0.3   | 0.5  | 6.4   | 28.3  |
|         | Sludge20     | 0.2   | 0.9  | 4.6   | 52.8  |
|         | No-sludge19C | 0.2   | 0.6  | 6.7   | 15.4  |
|         | No-sludge20C | 0.2   | 1.8  | 7.9   | 36.2  |
|         | No-sludge19F | 0.2   | 0.3  | 5.9   | 11.1  |
|         | No-sludge20F | 0.2   | 1.2  | 12.2  | 37.8  |
| Mn      | Sludge19     | 3.3   | 0.3  | 1.1   | 13.5  |
|         | Sludge20     | 4.4   | 0.3  | 1.7   | 15.0  |
|         | No-sludge19C | 4.2   | 0.5  | 1.1   | 9.5   |
|         | No-sludge20C | 7.9   | 0.9  | 3.7   | 13.4  |
|         | No-sludge19F | 2.5   | 0.2  | 0.7   | 5.1   |
|         | No-sludge20F | 7.3   | 0.5  | 4.3   | 11.2  |
| Ni      | Sludge19     | 5.5   | 0.4  | 3.2   | 15.5  |
|         | Sludge20     | 4.4   | 0.3  | 1.6   | 12.7  |
|         | No-sludge19C | 3.7   | 0.5  | 1.5   | 9.3   |
|         | No-sludge20C | 2.4   | 0.1  | 1.6   | 3.4   |
|         | No-sludge19F | 3.2   | 0.2  | 2.1   | 7.2   |
|         | No-sludge20F | 3.1   | 0.2  | 1.9   | 6.4   |
| Pb      | Sludge19     | 3.6   | 0.1  | 2.0   | 6.3   |
|         | Sludge20     | 4.3   | 0.2  | 1.9   | 12.4  |

|    |              |     |     |       |     |
|----|--------------|-----|-----|-------|-----|
|    | No-sludge19C | 3.1 | 0.3 | 1.5   | 5.8 |
|    | No-sludge20C | 5.0 | 0.5 | 3.1   | 8.7 |
|    | No-sludge19F | 2.9 | 0.1 | 2.0   | 4.3 |
|    | No-sludge20F | 4.3 | 0.1 | 1.9   | 5.1 |
| Cr | Sludge19     | 1.2 | 0.1 | 0.5   | 4.0 |
|    | Sludge20     | 1.5 | 0.2 | 0.6   | 7.3 |
|    | No-sludge19C | 2.0 | 0.4 | 0.6   | 7.3 |
|    | No-sludge20C | 1.2 | 0.4 | 0.6   | 5.8 |
|    | No-sludge19F | 0.9 | 0.0 | 0.6   | 1.4 |
|    | No-sludge20F | 1.3 | 0.1 | 0.7   | 2.3 |
| Se | Sludge19     | 1.2 | 0.0 | 0.8   | 2.3 |
|    | Sludge20     | 0.9 | 0.0 | 0.4   | 1.6 |
|    | No-sludge19C | 0.9 | 0.0 | 0.6   | 1.2 |
|    | No-sludge20C | 0.8 | 0.1 | 0.4   | 1.4 |
|    | No-sludge19F | 0.9 | 0.0 | 0.6   | 1.6 |
|    | No-sludge20F | 1.2 | 0.1 | 0.4   | 1.9 |
| Hg | Sludge19     | 0.5 | 0.0 | 0.3   | 1.0 |
|    | Sludge20     | 0.6 | 0.0 | 0.2   | 1.8 |
|    | No-sludge19C | 0.6 | 0.1 | 0.2   | 1.1 |
|    | No-sludge20C | 0.3 | 0.1 | 0.1   | 0.7 |
|    | No-sludge19F | 0.5 | 0.0 | 0.3   | 0.8 |
|    | No-sludge20F | 0.9 | 0.1 | 0.3   | 2.4 |
| Cd | Sludge19     | 0.3 | 0.0 | 0.2   | 0.7 |
|    | Sludge20     | 0.2 | 0.0 | < MQL | 0.6 |
|    | No-sludge19C | 0.2 | 0.1 | 0.1   | 1.1 |
|    | No-sludge20C | 0.2 | 0.0 | 0.1   | 0.5 |
|    | No-sludge19F | 0.2 | 0.0 | 0.1   | 0.3 |
|    | No-sludge20F | 0.2 | 0.0 | 0.1   | 0.3 |
| As | Sludge19     | 0.2 | 0.0 | < MQL | 0.8 |
|    | Sludge20     | 0.1 | 0.0 | < MQL | 0.4 |
|    | No-sludge19C | 0.3 | 0.0 | 0.1   | 0.8 |
|    | No-sludge20C | 0.4 | 0.0 | 0.1   | 0.6 |
|    | No-sludge19F | 0.2 | 0.0 | 0.1   | 0.4 |
|    | No-sludge20F | 0.5 | 0.0 | < MQL | 0.7 |

**Supplementary Table 2** Result of the linear mixed model of differences in trace element concentrations among groups of colonies. Contaminants are presented in decreasing mean concentration order. Significant pairwise differences are highlighted in bold. PBH indicates the P-values corrected with the Benjamini-Hochberg procedure.

| Element and overall test                  | Pairwise comparisons                | t           | df         | P <sub>BH</sub>  |
|-------------------------------------------|-------------------------------------|-------------|------------|------------------|
| <b>Zn:</b> $\chi^2_5 = 16.76$ , P < 0.005 | Sludge19 vs Sludge20                | 1.26        | 183        | 0.735            |
|                                           | No-sludge19F vs No-sludge19C        | 0.69        | 183        | 0.971            |
|                                           | No-sludge19F vs No-sludge20F        | 1.50        | 183        | 0.594            |
|                                           | Sludge19 vs No-sludge19C            | 1.90        | 183        | 0.317            |
|                                           | <b>Sludge19 vs No-sludge19F</b>     | <b>2.92</b> | <b>183</b> | <b>0.028</b>     |
|                                           | No-sludge19C vs No-sludge19F        | 0.69        | 183        | 0.971            |
|                                           | Sludge20 vs No-sludge20C            | 1.25        | 183        | 0.744            |
|                                           | Sludge20 vs No-sludge20F            | 2.13        | 183        | 0.201            |
|                                           | No-sludge20C vs No-sludge20F        | 0.34        | 183        | 0.999            |
| <b>Al:</b> $\chi^2_5 = 25.25$ , P < 0.001 | <b>Sludge19 vs Sludge20</b>         | <b>3.03</b> | <b>181</b> | <b>0.020</b>     |
|                                           | No-sludge19F vs No-sludge19C        | 0.19        | 181        | 1.00             |
|                                           | <b>No-sludge19F vs No-sludge20F</b> | <b>2.74</b> | <b>181</b> | <b>0.46</b>      |
|                                           | Sludge19 vs No-sludge19C            | 0.40        | 181        | 0.998            |
|                                           | Sludge19 vs No-sludge19F            | 0.23        | 181        | 0.999            |
|                                           | No-sludge19C vs No-sludge19F        | 0.19        | 181        | 1.00             |
|                                           | Sludge20 vs No-sludge20C            | 1.92        | 181        | 0.305            |
|                                           | Sludge20 vs No-sludge20F            | 0.8         | 181        | 0.947            |
|                                           | No-sludge20C vs No-sludge20F        | 1.18        | 181        | 0.783            |
| <b>Fe:</b> $\chi^2_5 = 21.78$ , P < 0.001 | <b>Sludge19 vs Sludge20</b>         | <b>4.31</b> | <b>182</b> | <b>&lt;0.001</b> |
|                                           | No-sludge19F vs No-sludge19C        | 0.84        | 182        | 0.938            |
|                                           | No-sludge19F vs No-sludge20F        | 0.60        | 182        | 0.986            |
|                                           | Sludge19 vs No-sludge19C            | 1.05        | 182        | 0.855            |
|                                           | Sludge19 vs No-sludge19F            | 0.17        | 182        | 1.00             |
|                                           | No-sludge19C vs No-sludge19F        | 0.84        | 182        | 0.938            |
|                                           | Sludge20 vs No-sludge20C            | 0.85        | 182        | 0.935            |
|                                           | Sludge20 vs No-sludge20F            | 2.70        | 182        | 0.052            |
|                                           | No-sludge20C vs No-sludge20F        | 1.06        | 182        | 0.853            |
| <b>Cu:</b> $\chi^2_5 = 69.19$ , P < 0.001 | Sludge19 vs Sludge20                | 0.67        | 179        | 0.975            |
|                                           | No-sludge19F vs No-sludge19C        | 1.37        | 179        | 0.656            |

|                                                                     |                                     |             |            |                  |
|---------------------------------------------------------------------|-------------------------------------|-------------|------------|------------------|
|                                                                     | <b>No-sludge19F vs No-sludge20F</b> | <b>7.30</b> | <b>179</b> | <b>&lt;0.001</b> |
|                                                                     | Sludge19 vs No-sludge19C            | 0.78        | 179        | 0.951            |
|                                                                     | Sludge19 vs No-sludge19F            | 2.68        | 179        | 0.054            |
|                                                                     | No-sludge19C vs No-sludge19F        | 1.37        | 179        | 0.656            |
|                                                                     | <b>Sludge20 vs No-sludge20C</b>     | <b>3.25</b> | <b>179</b> | <b>0.010</b>     |
|                                                                     | <b>Sludge20 vs No-sludge20F</b>     | <b>5.19</b> | <b>179</b> | <b>&lt;0.001</b> |
|                                                                     | No-sludge20C vs No-sludge20F        | 0.98        | 179        | 0.884            |
| <hr/>                                                               |                                     |             |            |                  |
| <b>Mn: <math>\chi^2_5 = 96.05</math>, <math>P &lt; 0.001</math></b> | <b>Sludge19 vs Sludge20</b>         | <b>3.13</b> | <b>182</b> | <b>0.015</b>     |
|                                                                     | No-sludge19F vs No-sludge19C        | 2.25        | 182        | 0.156            |
|                                                                     | <b>No-sludge19F vs No-sludge20F</b> | <b>7.87</b> | <b>182</b> | <b>&lt;0.001</b> |
|                                                                     | Sludge19 vs No-sludge19C            | 1.42        | 182        | 0.632            |
|                                                                     | Sludge19 vs No-sludge19F            | 1.14        | 182        | 0.808            |
|                                                                     | No-sludge19C vs No-sludge19F        | 2.25        | 182        | 0.156            |
|                                                                     | <b>Sludge20 vs No-sludge20C</b>     | <b>4.40</b> | <b>182</b> | <b>&lt;0.001</b> |
|                                                                     | <b>Sludge20 vs No-sludge20F</b>     | <b>4.53</b> | <b>182</b> | <b>&lt;0.001</b> |
|                                                                     | No-sludge20C vs No-sludge20F        | 0.86        | 182        | 0.932            |
| <hr/>                                                               |                                     |             |            |                  |
| <b>Ni: <math>\chi^2_5 = 24.45</math>, <math>P &lt; 0.001</math></b> | Sludge19 vs Sludge20                | 2.07        | 183        | 0.228            |
|                                                                     | No-sludge19F vs No-sludge19C        | 0.57        | 183        | 0.989            |
|                                                                     | No-sludge19F vs No-sludge20F        | 0.31        | 183        | 0.999            |
|                                                                     | <b>Sludge19 vs No-sludge19C</b>     | <b>2.77</b> | <b>183</b> | <b>0.043</b>     |
|                                                                     | <b>Sludge19 vs No-sludge19F</b>     | <b>3.76</b> | <b>183</b> | <b>0.002</b>     |
|                                                                     | No-sludge19C vs No-sludge19F        | 0.56        | 183        | 0.989            |
|                                                                     | Sludge20 vs No-sludge20C            | 2.60        | 183        | 0.067            |
|                                                                     | Sludge20 vs No-sludge20F            | 2.35        | 183        | 0.125            |
|                                                                     | No-sludge20C vs No-sludge20F        | 0.68        | 183        | 0.974            |
| <hr/>                                                               |                                     |             |            |                  |
| <b>Pb: <math>\chi^2_5 = 34.68</math>, <math>P &lt; 0.001</math></b> | <b>Sludge19 vs Sludge20</b>         | <b>3.18</b> | <b>181</b> | <b>0.013</b>     |
|                                                                     | No-sludge19F vs No-sludge19C        | 0.29        | 181        | 1.00             |
|                                                                     | <b>No-sludge19F vs No-sludge20F</b> | <b>3.58</b> | <b>181</b> | <b>0.003</b>     |
|                                                                     | Sludge19 vs No-sludge19C            | 0.89        | 181        | 0.922            |
|                                                                     | Sludge19 vs No-sludge19F            | 1.32        | 181        | 0.696            |
|                                                                     | No-sludge19C vs No-sludge19F        | 0.29        | 181        | 1.00             |
|                                                                     | Sludge20 vs No-sludge20C            | 1.28        | 181        | 0.723            |
|                                                                     | Sludge20 vs No-sludge20F            | 0.07        | 181        | 1.00             |
|                                                                     | No-sludge20C vs No-sludge20F        | 1.13        | 181        | 0.815            |

|                                           |                                     |             |            |                  |
|-------------------------------------------|-------------------------------------|-------------|------------|------------------|
| <b>Cr</b> $\chi^2_5 = 10.95$ , P = 0.052  |                                     |             |            |                  |
| <b>Se:</b> $\chi^2_5 = 35.50$ , P < 0.001 | <b>Sludge19 vs Sludge20</b>         | <b>3.62</b> | <b>183</b> | <b>0.003</b>     |
|                                           | No-sludge19F vs No-sludge19C        | 0.11        | 183        | 1.00             |
|                                           | <b>No-sludge19F vs No-sludge20F</b> | <b>4.29</b> | <b>183</b> | <b>&lt;0.001</b> |
|                                           | <b>Sludge19 vs No-sludge19C</b>     | <b>2.80</b> | <b>183</b> | <b>0.039</b>     |
|                                           | <b>Sludge19 vs No-sludge19F</b>     | <b>3.14</b> | <b>183</b> | <b>0.015</b>     |
|                                           | No-sludge19C vs No-sludge19F        | 0.11        | 183        | 1.00             |
|                                           | Sludge20 vs No-sludge20C            | 0.85        | 183        | 0.934            |
|                                           | Sludge20 vs No-sludge20F            | 2.10        | 183        | 0.214            |
|                                           | No-sludge20C vs No-sludge20F        | 2.23        | 183        | 0.163            |
| <b>Hg:</b> $\chi^2_5 = 27.87$ , P < 0.001 | <b>Sludge19 vs Sludge20</b>         | <b>2.89</b> | <b>182</b> | <b>0.030</b>     |
|                                           | No-sludge19F vs No-sludge19C        | 0.45        | 182        | 0.995            |
|                                           | <b>No-sludge19F vs No-sludge20F</b> | <b>4.08</b> | <b>182</b> | <b>&lt;0.001</b> |
|                                           | Sludge19 vs No-sludge19C            | 0.97        | 182        | 0.889            |
|                                           | Sludge19 vs No-sludge19F            | 0.52        | 182        | 0.993            |
|                                           | No-sludge19C vs No-sludge19F        | 0.47        | 182        | 0.995            |
|                                           | Sludge20 vs No-sludge20C            | 1.43        | 182        | 0.622            |
|                                           | Sludge20 vs No-sludge20F            | 2.05        | 182        | 0.235            |
|                                           | <b>No-sludge20C vs No-sludge20F</b> | <b>2.72</b> | <b>182</b> | <b>0.049</b>     |
| <b>Cd:</b> $\chi^2_5 = 37.59$ , P < 0.001 | <b>Sludge19 vs Sludge20</b>         | <b>5.48</b> | <b>182</b> | <b>&lt;0.001</b> |
|                                           | No-sludge19F vs No-sludge19C        | 1.84        | 182        | 0.344            |
|                                           | No-sludge19F vs No-sludge20F        | 0.09        | 182        | 1.00             |
|                                           | Sludge19 vs No-sludge19C            | 1.45        | 182        | 0.603            |
|                                           | <b>Sludge19 vs No-sludge19F</b>     | <b>3.83</b> | <b>182</b> | <b>0.001</b>     |
|                                           | No-sludge19C vs No-sludge19F        | 1.84        | 182        | 0.344            |
|                                           | Sludge20 vs No-sludge20C            | 0.42        | 182        | 1.0.997          |
|                                           | Sludge20 vs No-sludge20F            | 0.54        | 182        | 0.999            |
|                                           | No-sludge20C vs No-sludge20F        | 0.69        | 182        | 0.971            |
| <b>As:</b> $\chi^2_5 = 111.5$ , P < 0.001 | <b>Sludge19 vs Sludge20</b>         | <b>4.40</b> | <b>182</b> | <b>&lt;0.001</b> |
|                                           | No-sludge19F vs No-sludge19C        | 1.31        | 182        | 0.705            |
|                                           | <b>No-sludge19F vs No-sludge20F</b> | <b>6.63</b> | <b>182</b> | <b>&lt;0.001</b> |
|                                           | Sludge19 vs No-sludge19C            | 1.93        | 182        | 0.296            |
|                                           | Sludge19 vs No-sludge19F            | 0.59        | 182        | 0.986            |
|                                           | No-sludge19C vs No-sludge19F        | 1.31        | 182        | 0.705            |

|                                 |             |            |                  |
|---------------------------------|-------------|------------|------------------|
| <b>Sludge20 vs No-sludge20C</b> | <b>5.78</b> | <b>182</b> | <b>&lt;0.001</b> |
| <b>Sludge20 vs No-sludge20F</b> | <b>9.46</b> | <b>182</b> | <b>&lt;0.001</b> |
| No-sludge20C vs No-sludge20F    | 1.43        | 182        | 0.621            |

---
